# Supplementary material for: Corneal Optical Densitometry in the Evaluation of 2-Year Graft Function Following Endothelial Keratoplasty
Source: MDPI journal article supplement (doi:10.3390/jcm12041552), 2023-02-16
Supplement: s1 [file s1]

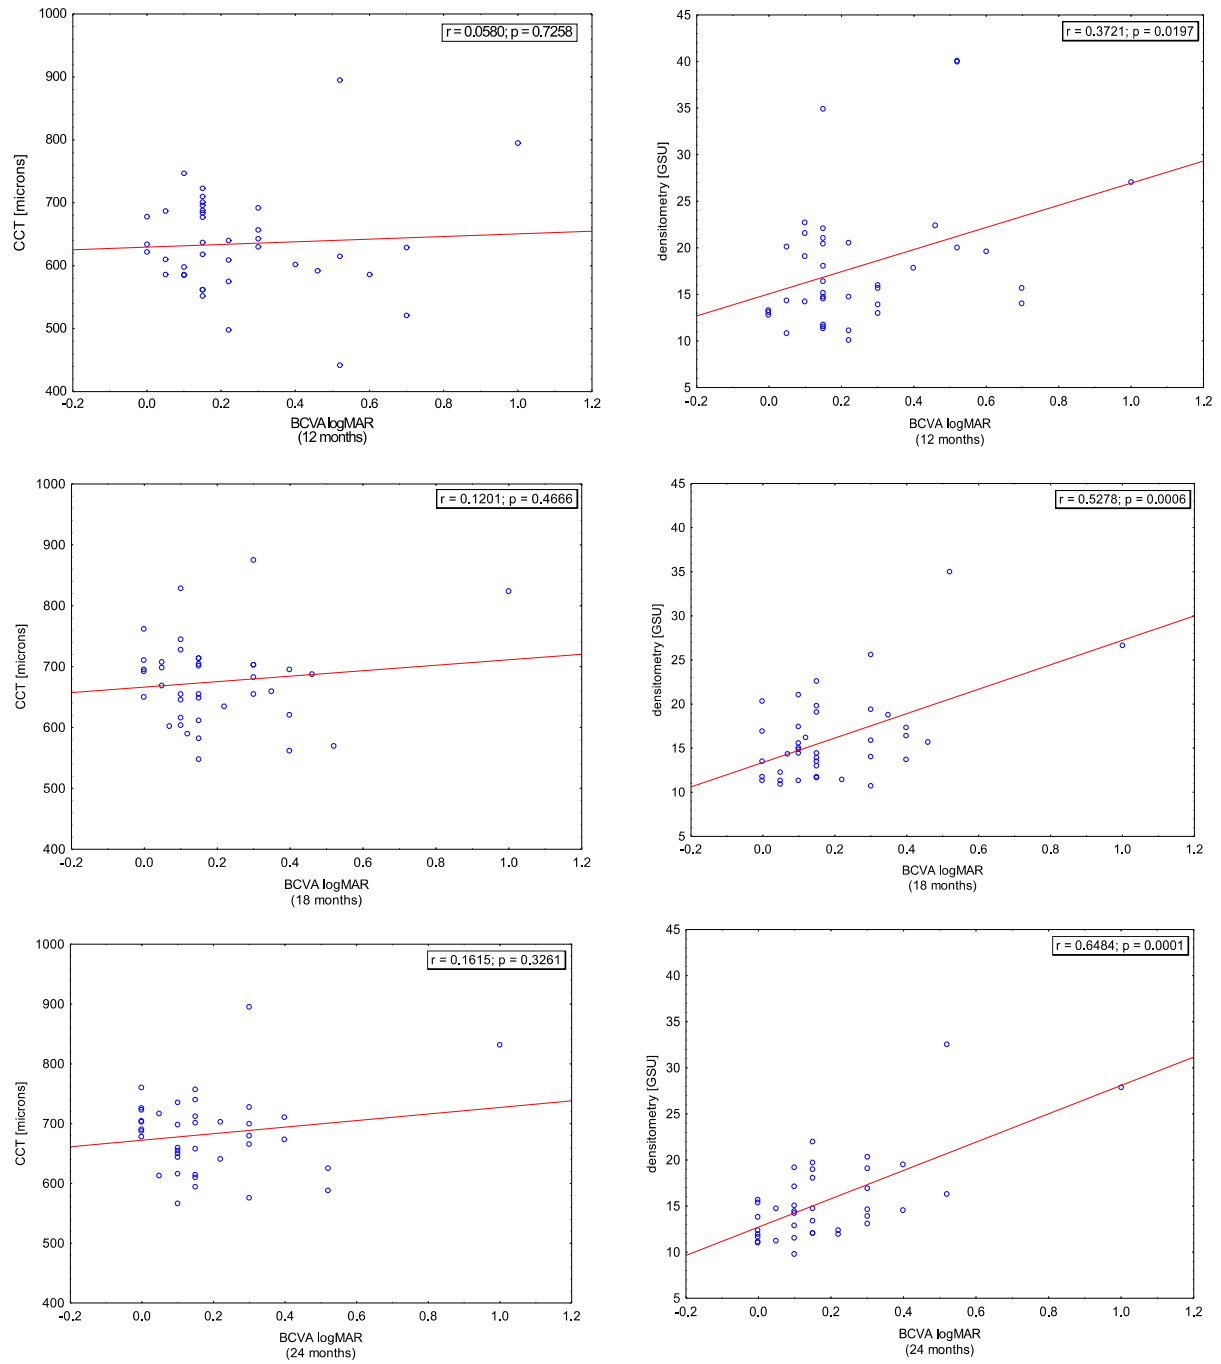

**Figure S1.** Correlations of BCVA with pachymetry and densitometry in the late postoperative period. BCVA, best corrected visual acuity; CCT, central corneal thickness; GSU, grayscale units.
