# Supplementary material for: Corneal Optical Densitometry in the Evaluation of 2-Year Graft Function Following Endothelial Keratoplasty
Source: MDPI journal article supplement (doi:10.3390/jcm12041552), 2023-02-16
Supplement: s1 [file s1]

Table S1. Precise measurement estimates with reference to figure 4. BCVA, best corrected visual acuity; CCT, central corneal thickness; GSU, grayscale units; ECD, endothelial cell density; preop, preoperatively; mo, month; Std.Dev, standard deviation.

|            | Mean     | Confidence<br>-95,00% | Confidence<br>95,00% | Median   | Minimal  | Maximal  | Std.Dev. |
|------------|----------|-----------------------|----------------------|----------|----------|----------|----------|
| BCVA_preop | 0,046641 | 0,020964              | 0,072318             | 0,02     | 0,001    | 0,4      | 0,07921  |
| BCVA_1mo   | 0,348462 | 0,279875              | 0,417048             | 0,3      | 0,03     | 0,9      | 0,21158  |
| BCVA_3mo   | 0,44359  | 0,366378              | 0,520802             | 0,4      | 0,1      | 1        | 0,238189 |
| BCVA_6mo   | 0,566667 | 0,483161              | 0,650172             | 0,6      | 0,1      | 1,2      | 0,257604 |
| BCVA_12mo  | 0,617949 | 0,541338              | 0,694559             | 0,7      | 0,1      | 1        | 0,236334 |
| BCVA_18mo  | 0,684615 | 0,613269              | 0,755962             | 0,7      | 0,1      | 1        | 0,220094 |
| BCVA_24mo  | 0,705128 | 0,630779              | 0,779477             | 0,7      | 0,1      | 1        | 0,229357 |
| CCT_preop  | 962,7179 | 891,1961              | 1034,240             | 971,0000 | 638,0000 | 1740,000 | 220,6357 |
| CCT_1mo    | 598,5641 | 576,7531              | 620,375              | 602,0000 | 461,0000 | 766,000  | 67,2841  |
| CCT_3mo    | 573,4103 | 553,1429              | 593,678              | 577,0000 | 450,0000 | 707,000  | 62,5223  |
| CCT_6mo    | 602,6923 | 578,1054              | 627,279              | 602,0000 | 432,0000 | 847,000  | 75,8475  |
| CCT_12mo   | 634,9744 | 608,7374              | 661,211              | 629,0000 | 442,0000 | 895,000  | 80,9378  |
| CCT_18mo   | 675,0256 | 651,8896              | 698,162              | 682,0000 | 548,0000 | 875,000  | 71,3717  |
| CCT_24mo   | 682,3333 | 660,8886              | 703,778              | 687,0000 | 566,0000 | 894,000  | 66,1543  |
| GSU_preop  | 44,00603 | 38,64045              | 49,3716              | 42,77    | 16,575   | 80,875   | 16,55211 |
| GSU_1mo    | 29,90269 | 25,79352              | 34,01187             | 27,01    | 12,05    | 60,775   | 12,67628 |
| GSU_3mo    | 22,65679 | 19,53697              | 25,77662             | 20,25    | 11,33    | 50,82    | 9,62427  |
| GSU_6mo    | 20,06885 | 17,4532               | 22,68449             | 17,39    | 11,02    | 44,6     | 8,06893  |
| GSU_12mo   | 18,0659  | 15,74848              | 20,38331             | 15,69    | 10,1     | 40,025   | 7,14894  |
| GSU_18mo   | 16,09218 | 14,46715              | 17,71721             | 14,87    | 10,7     | 34,95    | 5,01301  |
| GSU_24mo   | 15,55051 | 14,05451              | 17,04652             | 14,55    | 9,725    | 32,49    | 4,61498  |
| ECD_preop  | 2587,436 | 2496,083              | 2678,788             | 2557     | 2150     | 3194     | 281,8111 |
| ECD_1mo    | 2333,026 | 2246,755              | 2419,296             | 2341     | 1850     | 2737     | 266,1346 |
| ECD_3mo    | 2122,462 | 2036,129              | 2208,794             | 2100     | 1692     | 2689     | 266,3257 |
| ECD_6mo    | 1889     | 1814,241              | 1963,759             | 1844     | 1541     | 2413     | 230,6234 |
| ECD_12mo   | 1806,462 | 1730,103              | 1882,82              | 1762     | 1404     | 2398     | 235,5551 |
| ECD_18mo   | 1719,487 | 1651,027              | 1787,948             | 1692     | 1382     | 2217     | 211,1916 |
| ECD_24mo   | 1630,795 | 1563,731              | 1697,859             | 1607     | 1296     | 2095     | 206,8834 |
